# Supplementary material
Source: Springer Nature journal article supplement (https://www.springermedizin.de/resource/supplementary/12889_2010_2176_MOESM1_ESM.pdf/9484856)
Supplement: MOESM1 [file 9484856]

**18,374 subjects aged  $\geq 30$  yrs women and  
 $\geq 40$  yrs men**

2005 (n=5,131); 2006 (n=4,687)  
2007 (n=4,275); 2008 (n=4,281)

Average response rate: 44.3%

**8,145 subjects with no previous cancer  
diagnosis underwent interview survey**

2005 (n=2,052, 40.0%); 2006 (n=2,033, 43.3%)  
2007 (n=2,022, 47.3%); 2008 (n=2,038, 47.6%)

Study inclusion rate: 45.4%

**3,699 subjects aged 50-79 yrs old men and  
women included final analysis**

2005 (n=927, 45.2%); 2006 (n=944, 46.4%);  
2007 (n=906, 44.8%); 2008 (n=922, 45.2%)

**Excluded (n=10,229)**

- Refused to participate (n=6,100)
- Incomplete survey (n=1,147)
- Not meeting including criteria (n=2,982)

**Excluded (n=4,446)**

- Men and women aged  $< 50$  yrs and  
 $\geq 80$  yrs (n=4,299)
- Missing information for income (n=105)
- Respondents who had undergone CRC  
screening because of a health problem  
(n=42)
